# Supplementary material for: The effect of lithium content on the discharge and electrochemical performance of Mg–Li–Zn–Y alloys for primary Mg–air batteries
Source: Royal Society of Chemistry journal article supplement (doi:10.1039/d4ta08376h), 2025-01-01
Supplement: d4ta08376h1.pdf [file d4ta08376h1.pdf]

## Supporting Information

### The effect of lithium content on the discharge and electrochemical performance of Mg-Li-Zn-Y alloy for primary Mg-air batteries

Xu Cheng<sup>1</sup>, Beibei Sun<sup>1,2</sup>, Tingting Wei<sup>1</sup>, Jiemin Dong<sup>1</sup>, Xin Cao<sup>1</sup>, Jiaxin Zhang<sup>1</sup>, Yanhua Zhang<sup>1</sup>, Tao Wang<sup>1</sup>, Yanhui Liu<sup>1</sup>, Feng Zhong<sup>1\*</sup>, Ming Liang<sup>1\*</sup>,  
Jianfeng Li<sup>1</sup>

<sup>1</sup>Institute of Magnesium and Lithium Materials, Northwest Institute for Nonferrous Metal Research, Xi'an, Shannxi 710016, China

<sup>2</sup>School of Materials Science and Engineering, Xi'an University of Technology, Xi'an, Shannxi 710043, China

\* Corresponding author:

Ming Liang

Email: mliang@c-nin.com

Feng Zhong

Email: mlszf06@163.com

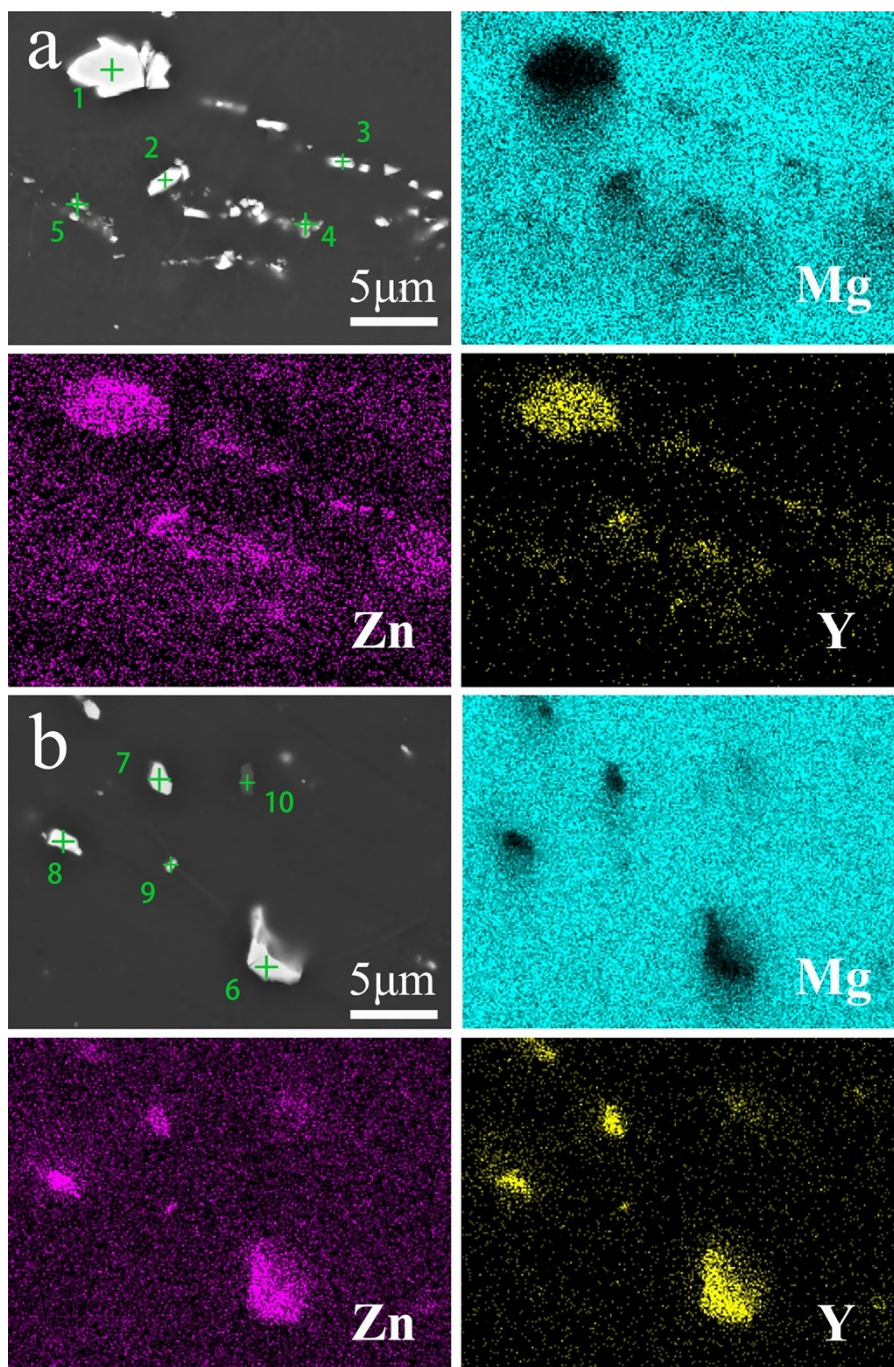

Fig. S1. EDS elements mapping of (a) ML8 and (b) ML11.

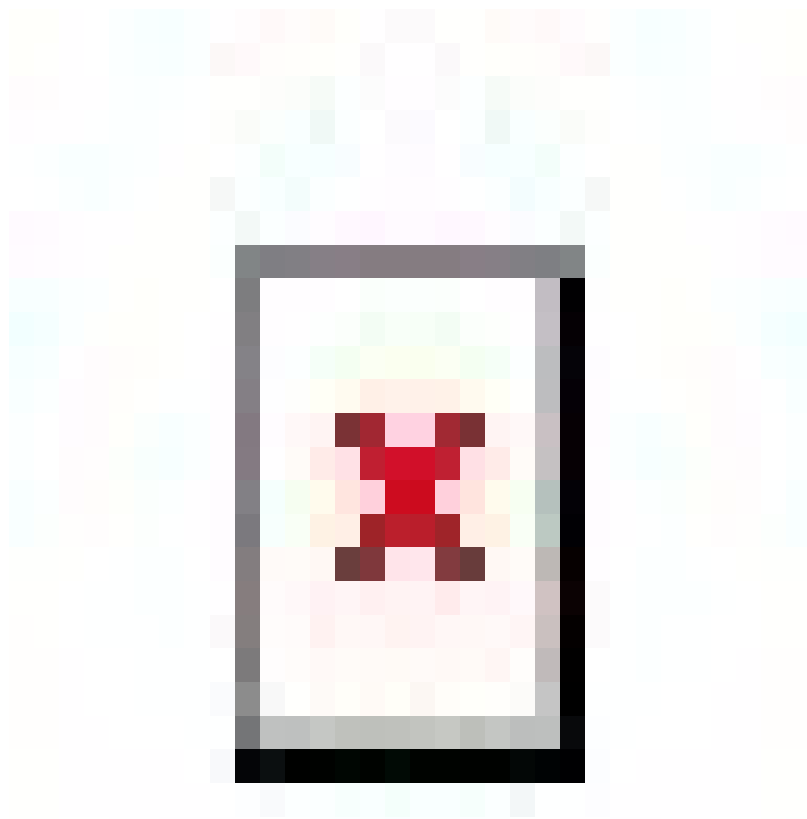

Fig. S2. TEM analysis of ML8 alloy: (a) TEM images and SAED pattern of the corresponding region, (b) HRTEM images.

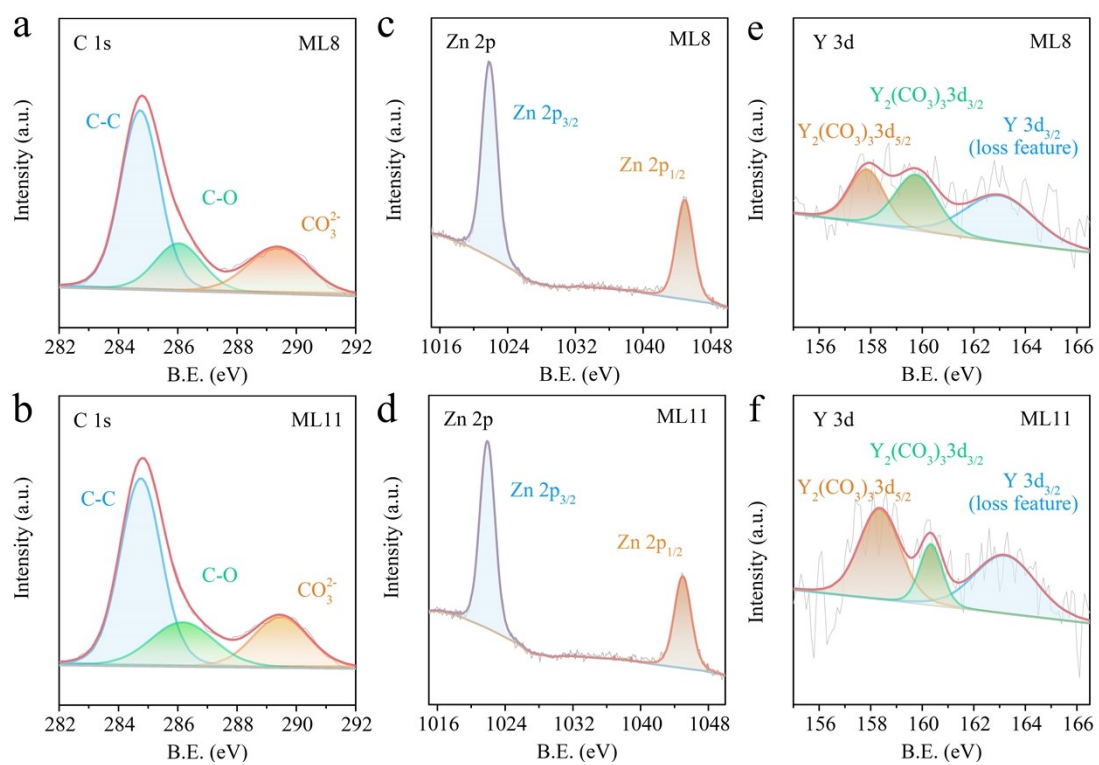

Fig. S3. XPS results of ML8 and ML11, (a-b) survey scanning spectrum, (c-d) Zn 2p spectra, and (e-f) Y 3d spectra.

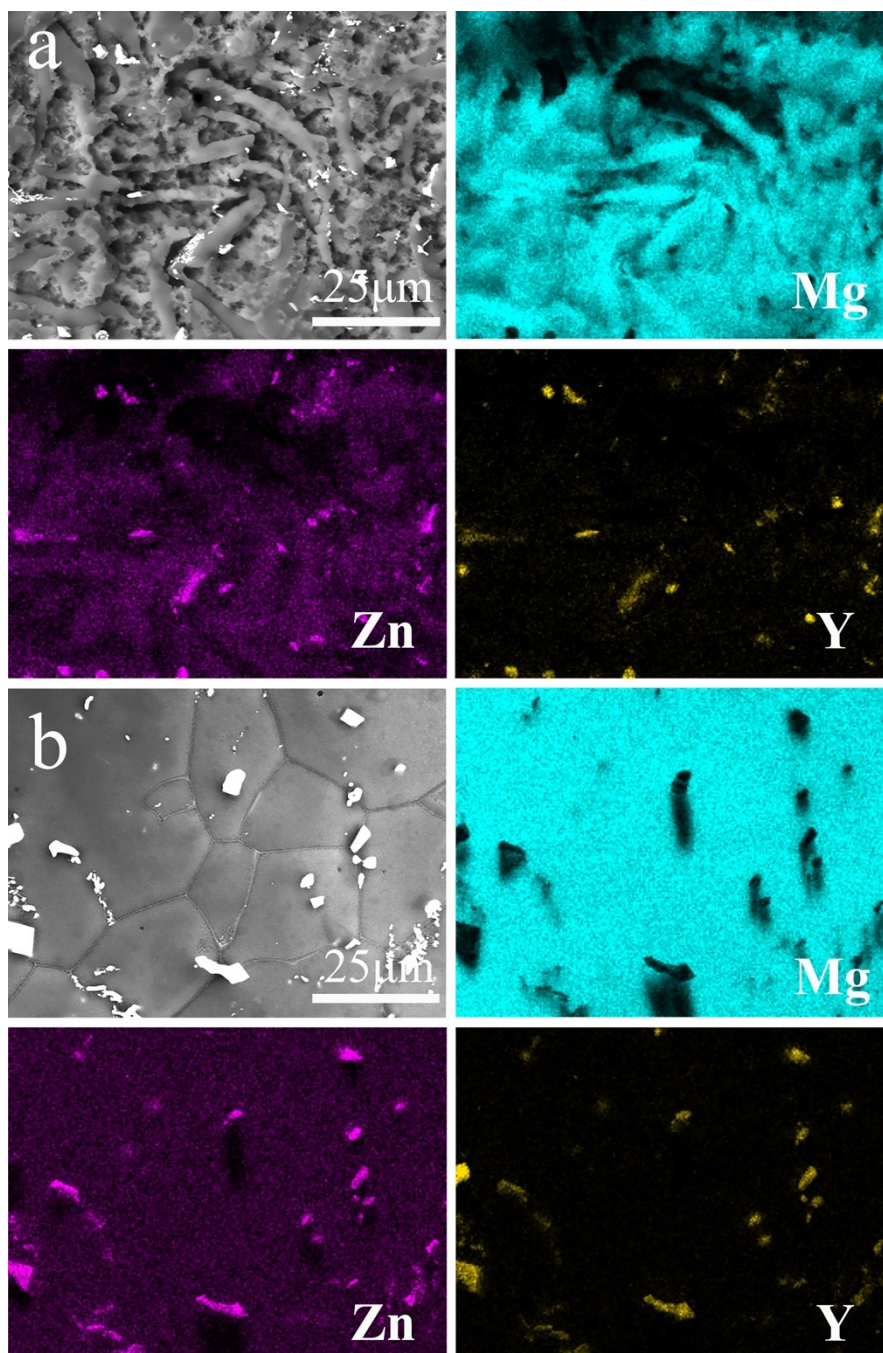

Fig. S4. EDS elements mapping of (a) ML8 and (b) ML11 after removal of discharge products.

Table S1. Proportion of elements at different positions and the ratio of Zn and Y

(at.%).

| Position | Mg/%  | Zn/%  | Y/%   | Zn/Y  |
|----------|-------|-------|-------|-------|
| 1        | 15.61 | 44.64 | 39.75 | 1.12  |
| 2        | 63.77 | 23.67 | 12.56 | 1.88  |
| 3        | 78.77 | 13.56 | 7.67  | 1.77  |
| 4        | 84.00 | 10.52 | 5.48  | 1.92  |
| 5        | 86.22 | 9.02  | 4.75  | 1.90  |
| 6        | 39.39 | 34.66 | 25.95 | 1.34  |
| 7        | 52.73 | 24.24 | 23.03 | 1.05  |
| 8        | 43.54 | 35.99 | 20.47 | 1.76  |
| 9        | 83.75 | 10.48 | 5.77  | 1.82  |
| 10       | 97.19 | 2.64  | 0.17  | 15.53 |
